# Supplementary material for: Revealing Prognostic and Immunotherapy-Sensitive Characteristics of a Novel Cuproptosis-Related LncRNA Model in Hepatocellular Carcinoma Patients by Genomic Analysis
Source: MDPI journal article supplement (doi:10.3390/cancers15020544), 2023-01-16
Supplement: s1 [file s1]

Table S1 The clinical characteristics of HCC patients in the training cohort, testing cohort, and total TCGA database.

| Characteristics | Levels    | Total       | Testing cohort | Training cohort | P value |
|-----------------|-----------|-------------|----------------|-----------------|---------|
| Age, n (%)      | <=65      | 216(62.97%) | 87(63.5%)      | 129(62.62%)     | 0.9589  |
|                 | >65       | 127(37.03%) | 50(36.5%)      | 77(37.38%)      |         |
| Gender, n (%)   | FEMALE    | 110(32.07%) | 39(28.47%)     | 71(34.47%)      | 0.2948  |
|                 | MALE      | 233(67.93%) | 98(71.53%)     | 135(65.53%)     |         |
| Grade, n (%)    | G1        | 53(15.45%)  | 19(13.87%)     | 34(16.5%)       | 0.8201  |
|                 | G2        | 161(46.94%) | 69(50.36%)     | 92(44.66%)      |         |
|                 | G3        | 112(32.65%) | 44(32.12%)     | 68(33.01%)      |         |
|                 | G4        | 12(3.5%)    | 5(3.65%)       | 7(3.4%)         |         |
|                 | unknow    | 5(1.46%)    | 0(0%)          | 5(2.43%)        |         |
| Stage, n (%)    | Stage I   | 161(46.94%) | 58(42.34%)     | 103(50%)        | 0.3528  |
|                 | Stage II  | 77(22.45%)  | 35(25.55%)     | 42(20.39%)      |         |
|                 | Stage III | 80(23.32%)  | 37(27.01%)     | 43(20.87%)      |         |
|                 | Stage IV  | 3(0.87%)    | 1(0.73%)       | 2(0.97%)        |         |
|                 | unknow    | 22(6.41%)   | 6(4.38%)       | 16(7.77%)       |         |
| T, n (%)        | T1        | 168(48.98%) | 59(43.07%)     | 109(52.91%)     | 0.2621  |
|                 | T2        | 84(24.49%)  | 39(28.47%)     | 45(21.84%)      |         |
|                 | T3        | 75(21.87%)  | 34(24.82%)     | 41(19.9%)       |         |
|                 | T4        | 13(3.79%)   | 5(3.65%)       | 8(3.88%)        |         |
|                 | unknow    | 3(0.87%)    | 0(0%)          | 3(1.46%)        |         |
| M, n (%)        | M0        | 245(71.43%) | 100(72.99%)    | 145(70.39%)     | 1       |
|                 | M1        | 3(0.87%)    | 1(0.73%)       | 2(0.97%)        |         |
|                 | unknow    | 95(27.7%)   | 36(26.28%)     | 59(28.64%)      |         |
| N, n (%)        | N0        | 239(69.68%) | 98(71.53%)     | 141(68.45%)     | 1       |
|                 | N1        | 3(0.87%)    | 1(0.73%)       | 2(0.97%)        |         |
