# Supplementary material for: Revealing Prognostic and Immunotherapy-Sensitive Characteristics of a Novel Cuproptosis-Related LncRNA Model in Hepatocellular Carcinoma Patients by Genomic Analysis
Source: MDPI journal article supplement (doi:10.3390/cancers15020544), 2023-01-16
Supplement: s1 [file s1]

Table S2 Primers used for qRT-PCR

| qRT-PCR primers | Sequences (5'-3')                                                          |
|-----------------|----------------------------------------------------------------------------|
| GAPDH           | Forward: TCACCAGGGCTGCTTTTAAC<br>Reverse: GACAAGCTTCCCGTTCTCAG             |
| sn-RNU6         | Forward: GTGCTCGCTTCGGCAGCACATATAC<br>Reverse: AAAAATATGGAACGCTTCACGAATTTG |
| NLRP3           | Forward: GATCTTCGCTGCGATCAACAG<br>Reverse: CGTGCATTATCTGAACCCAC            |
| AL365361.1      | Forward: CCAATAAATGGCTCTAAAC<br>Reverse: TAATGGCAGTGACAGGAT                |
| miR-17-5p       | Forward: CAAAGTGCTTACAGTGCAGGTAG<br>Reverse: Universal Primer (QIAGEN)     |
